# Supplementary material
Source: PubMed Central journal article supplement (PMC2879794)
Supplement: pp.110.154815_1.pdf [file pp.110.154815_1.pdf]

## SUPPLEMENTARY DATA

The following materials will be available in the online version of this article.

**Figure S1.**

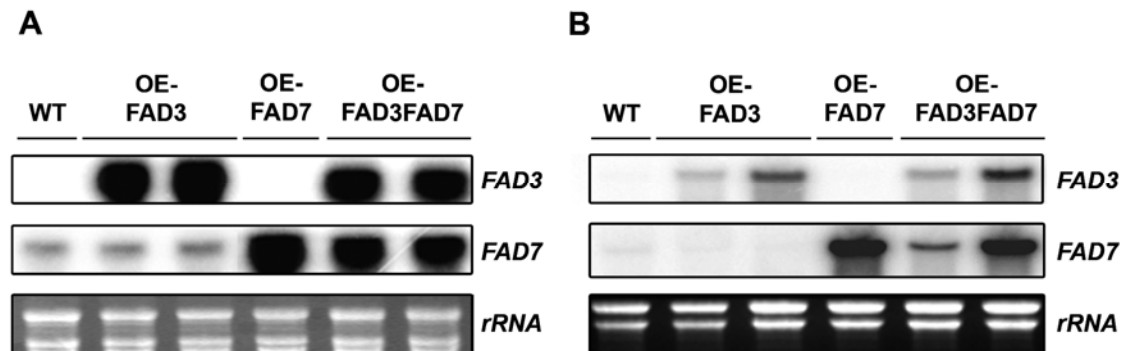

**Figure S1. Abundance of *FAD3* and *FAD7* mRNA in OE-FAD transgenic tomatoes**

Total RNA (10  $\mu$ g) isolated from young fully-expanded leaves (A) and ripe red fruit (B) was fractionated in denaturing agarose gels, transferred to nylon membranes and hybridized with  $^{32}$ P-radiolabeled *BnFAD3* and *StFAD7*. Lower panel shows equal loading and integrity of rRNA.

**Figure S2.**

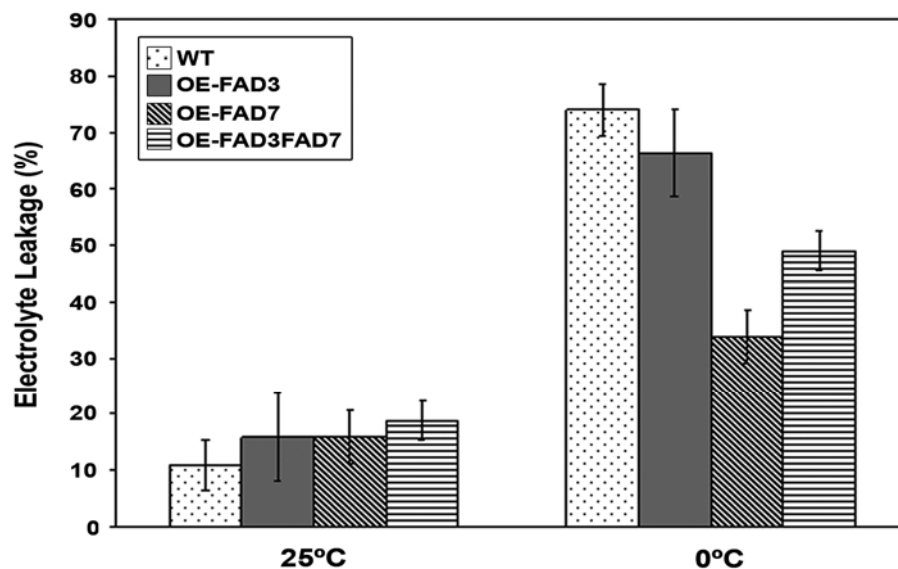

**Figure S2. Low temperature treatment of WT and OE-FAD transgenic plants grown in tissue culture**

Relative injury as determined by electrolyte leakage from tissue culture grown tomato before cold treatment (25°C) and following 24 h recovery of cold treated plants chilled in continuous light ( $100 \mu\text{mol m}^{-2}\text{s}^{-1}$  light intensity) at 0°C. WT: dotted, OE-FAD3: grey, OE-FAD7: diagonal hatches, OE-FAD3FAD7: horizontal hatches. Measurements were taken on the entire seedling of similar developmental stage from all treatments. Values are means  $\pm$  SD of three replicas.
